# Supplementary material
Source: MDPI journal article supplement (https://www.mdpi.com/2079-6412/14/3/287)
Supplement: s1 [file s1 › coatings-2863660-supplementary.pdf]

# Supplementary Materials

## Enhanced anti-corrosion and antibacterial functionalities of magnesium alloy via facile laser-chemical treatment

Wei Xiong<sup>1,\*</sup>, Jiajun Fu<sup>2,3</sup>, Chao Liu<sup>2,3</sup>, Li Li<sup>4,5</sup>, Huixin Wang<sup>4,5</sup>, Mingjun Zhang<sup>6</sup>, Zhiqiang Ge<sup>7</sup>, Tairui Zhang<sup>2</sup>, Qinghua Wang<sup>2,3</sup>

<sup>1</sup> *Department of Medical, Hunan Traditional Chinese Medical College, Zhuzhou 412012, China*

<sup>2</sup> *School of Mechanical Engineering, Southeast University, Nanjing 211189, China*

<sup>3</sup> *Jiangsu Key Laboratory for Design and Manufacture of Micro-Nano Biomedical Instruments, Nanjing 211189, China*

<sup>4</sup> *Institute of Agricultural Facilities and Equipment, Jiangsu Academy of Agricultural Sciences, Nanjing 210014, China*

<sup>5</sup> *Key Laboratory of Protected Agriculture Engineering in the Middle and Lower Reaches of Yangtze River, Ministry of Agriculture and Rural Affairs, Nanjing 210014, China*

<sup>6</sup> *Hunan Provincial Key Laboratory of Intelligent Manufacturing Technology for High-performance Mechanical Equipment, Changsha University of Science and Technology, Changsha 410114, China*

<sup>7</sup> *Special Equipment Safety Supervision Inspection Institute of Jiangsu Province, Nanjing 210000, China*

\*E-mail address: drwei@hhu.edu.cn.

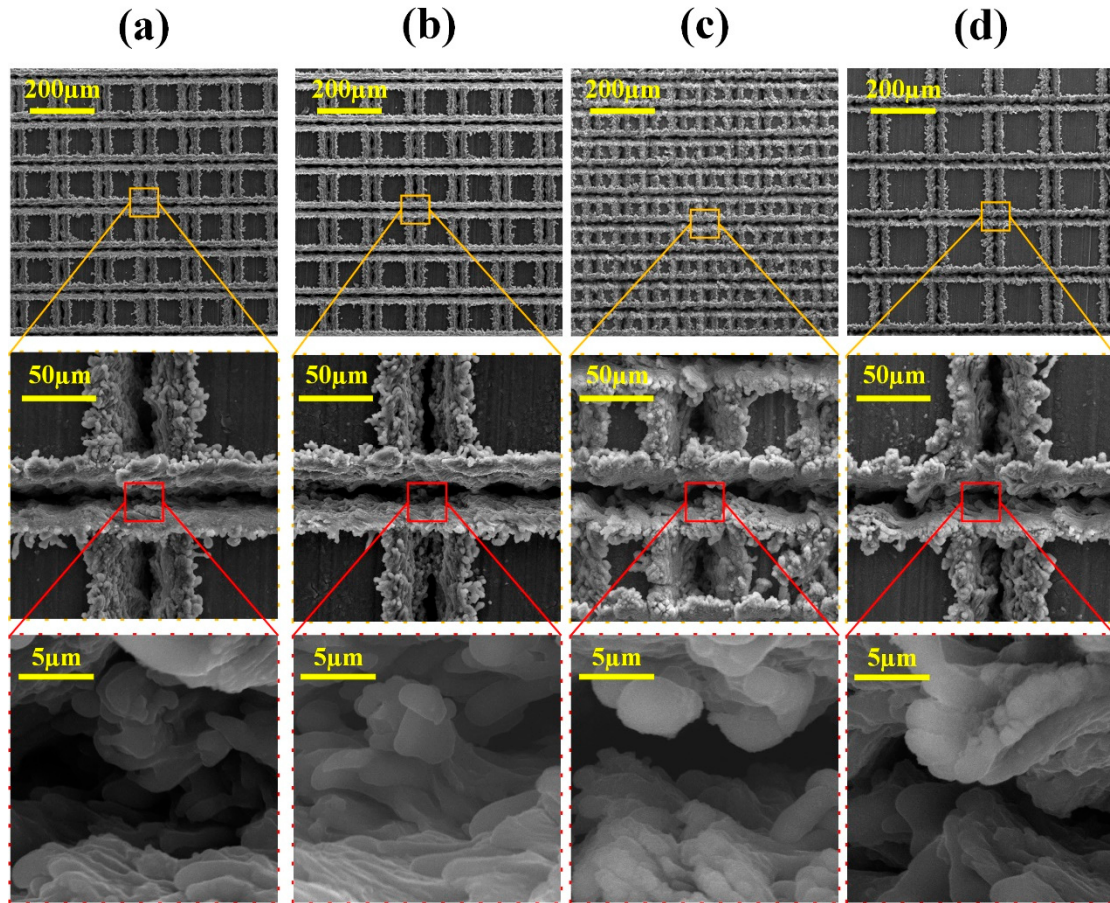

Figure S1. SEM micrographs of the laser structured Mg alloy surfaces processed by different laser processing parameters: (a) scanning speed of 50 mm/s and step size of 150  $\mu\text{m}$ ; (b) scanning speed of 100 mm/s and step size of 150  $\mu\text{m}$ ; (c) scanning speed of 20 mm/s and step size of 100  $\mu\text{m}$ ; (d) scanning speed of 20 mm/s and step size of 200  $\mu\text{m}$ .

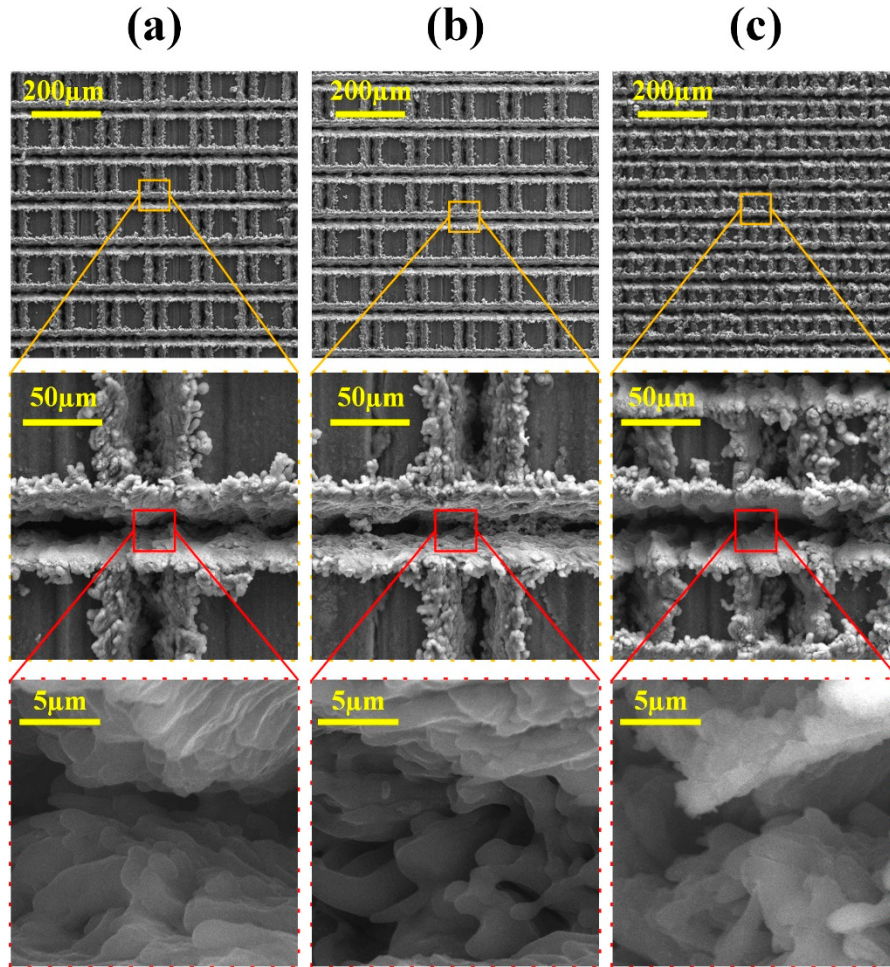

Figure S2. SEM micrographs of the laser-chemical treated Mg alloy surfaces processed by different laser processing parameters: (a) scanning speed of 50 mm/s and step size of 150  $\mu\text{m}$ ; (b) scanning speed of 100 mm/s and step size of 150  $\mu\text{m}$ ; (c) scanning speed of 20 mm/s and step size of 100  $\mu\text{m}$ .

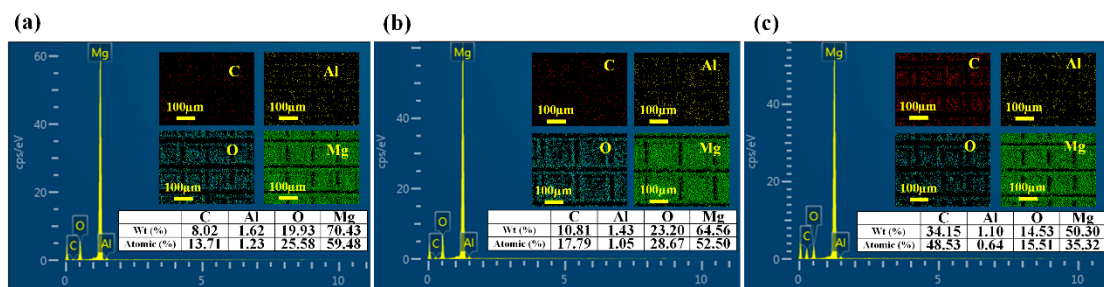

Figure S3. EDS spectra for (a) laser structured Mg alloy surfaces processed with a scanning speed of 100 mm/s and step size of 150  $\mu\text{m}$ ; (b) laser-chemical treated Mg alloy surface processed with a scanning speed of 20 mm/s and step size of 200  $\mu\text{m}$ ; (c) laser-chemical treated Mg alloy surface processed with a scanning speed of 100 mm/s and step size of 150  $\mu\text{m}$ .
